# Supplementary material
Source: PubMed Central journal article supplement (PMC2855260)
Supplement: jn.109.116749_1.pdf [file jn.109.116749_1.pdf]

Supplemental figure 1:

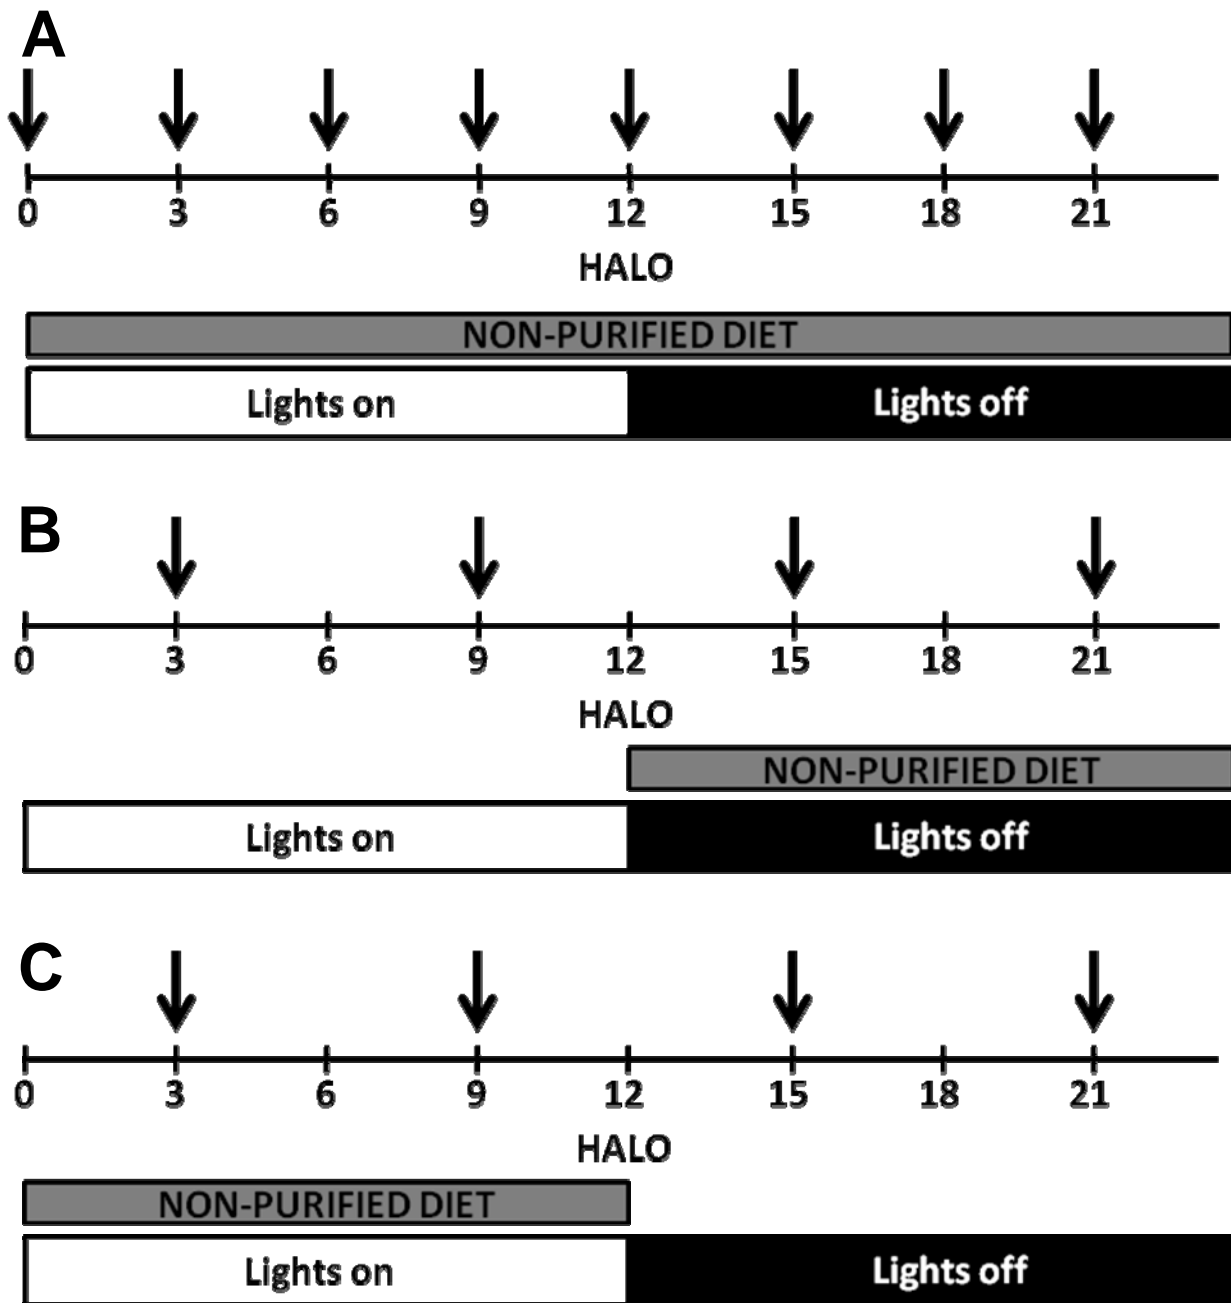

**Supplemental Figure 1:** Schematic showing light cycle, time of food availability, and harvest times (black arrows) in AL (A), DF (B) and LF (C) rats.

Supplemental figure 2:

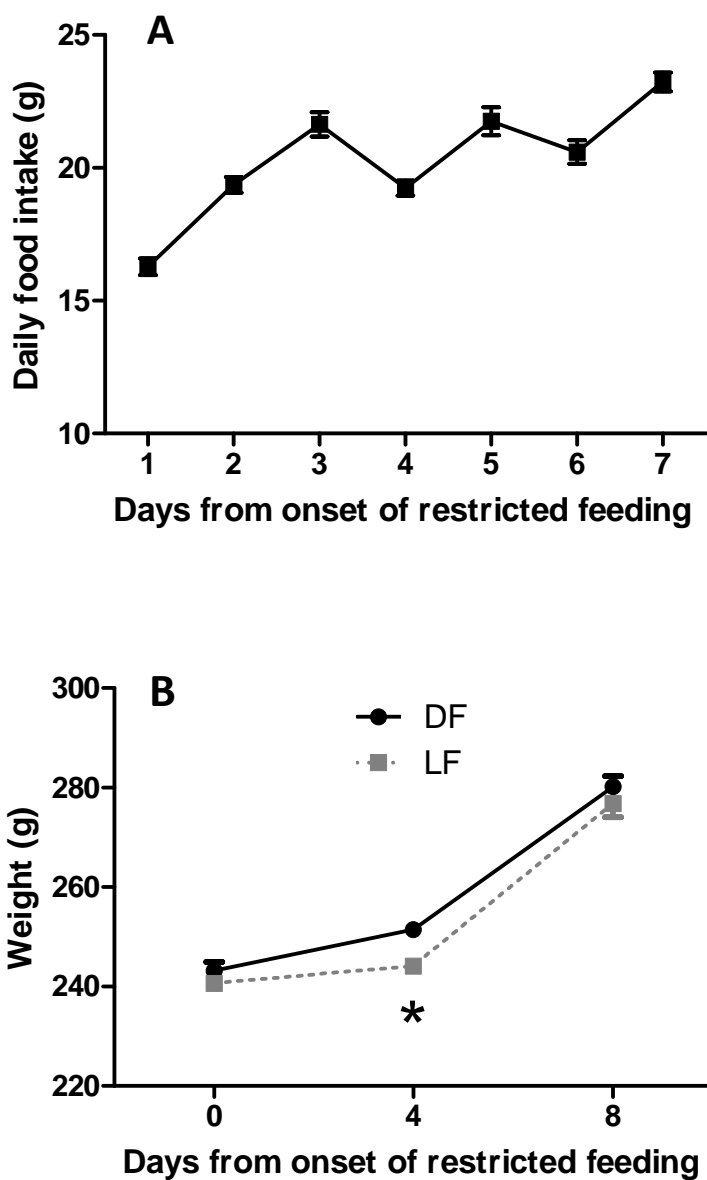

**Supplemental Figure 2:** Daily food intake in LF rats (A) and body weight in LF and DF rats (B). Values are means  $\pm$  SEM, n=25 (A) and 25 per group (B). The mean food intake of LF rats was offered to DF rats so intakes did not differ. In (B), \*Different from DF at that time,  $p < 0.05$ .

Supplemental table 1:

| Gene            | Primer sequence                 |
|-----------------|---------------------------------|
| <i>Per1</i>     | 5' CGCACTTCGGGAGCTCAAACCTC 3'   |
|                 | 3' GTCCATGGCACAGGGCTCACC 5'     |
| <i>Bmall</i>    | 5' TCCGATGACGAACTGAAACAC 3'     |
|                 | 3' CTCGGTCACATCCTACGACAA 5'     |
| <i>Clock</i>    | 5' TTCGATCACAGCCCAACTCC 3'      |
|                 | 3' ACCTCCGCTGTGTCATCTTCTC 5'    |
| <i>Reverb A</i> | 5' TAGGCACCTCACCTGGCAACT 3'     |
|                 | 3' GCACTGTGGAGTGGTAGCCG 5'      |
| <i>Reverb B</i> | 5' TTTTGAGGTTTTAATGGTGCG 3'     |
|                 | 3' GTGACAGTCCGCTCCTTTGC 5'      |
| <i>Cry1</i>     | 5' GGGAAGCGCCCAAGTCAGGAAG 3'    |
|                 | 3' CCTCCCGCATGCTTTCATATC 5'     |
| <i>Cry2</i>     | 5' TTCAGAAGGCCGCTAATTGC 3'      |
|                 | 3' AGATCTGCTTCATCCGCTCAA 5'     |
| <i>Sglt1</i>    | 5' CCAAGCCCATCCCAGACGTACACC 3'  |
|                 | 5' _CTTCCTTAGTCATCTTCGGTCCTT 3' |
| <i>B-actin</i>  | 5' GGATCAGCAAGCAGGAGTACGA 3'    |
|                 | 3' AACGCAGCTCAGTAACAGTCCG 5'    |

Supplemental Table 1: qPCR primers for rat clock genes, the sodium glucose co-transporter *Sglt1* and *B-actin*. Thermal cycler conditions used were 2 min 50°C; 10 min 95°C; followed by 40 cycles of 15 s at 95°C and 1 min 60°C. Dissociation curves were obtained to ensure a single amplicon.
